# Supplementary material for: Tunable multicolor and bright white emission in PEG modified β-NaGdF4 nanocrystals by systematic introduction of Ce3+ and Mn2+/Ln3+
Source: Royal Society of Chemistry journal article supplement (doi:10.1039/d2ra00265e), 2022-01-01
Supplement: d2ra00265e1.pdf [file d2ra00265e1.pdf]

## Supporting information

### **Tunable multicolor and bright white emission in PEG modified $\beta$ -NaGdF<sub>4</sub> nanocrystals by systematic introduction of Ce<sup>3+</sup> and Mn<sup>2+</sup>/Ln<sup>3+</sup>**

Xiaolong Li,<sup>a†</sup> Yaru Pei,<sup>a</sup> Ruimei Liang,<sup>a</sup> Chao Qian,<sup>b</sup> Jinzeng Wang<sup>a†</sup>

<sup>a</sup> Key Laboratory of Magnetic Molecules and Magnetic Information Materials, Ministry of Education, School of Chemistry and Materials Science, Shanxi Normal University, Taiyuan, 030032, China

<sup>b</sup> School of Physics and Electronics and Key Laboratory of Low-dimensional Quantum Structures and Quantum Control of the Ministry of Education, Synergetic Innovation Center for Quantum Effects and Applications, Hunan Normal University, Changsha 410081, China.

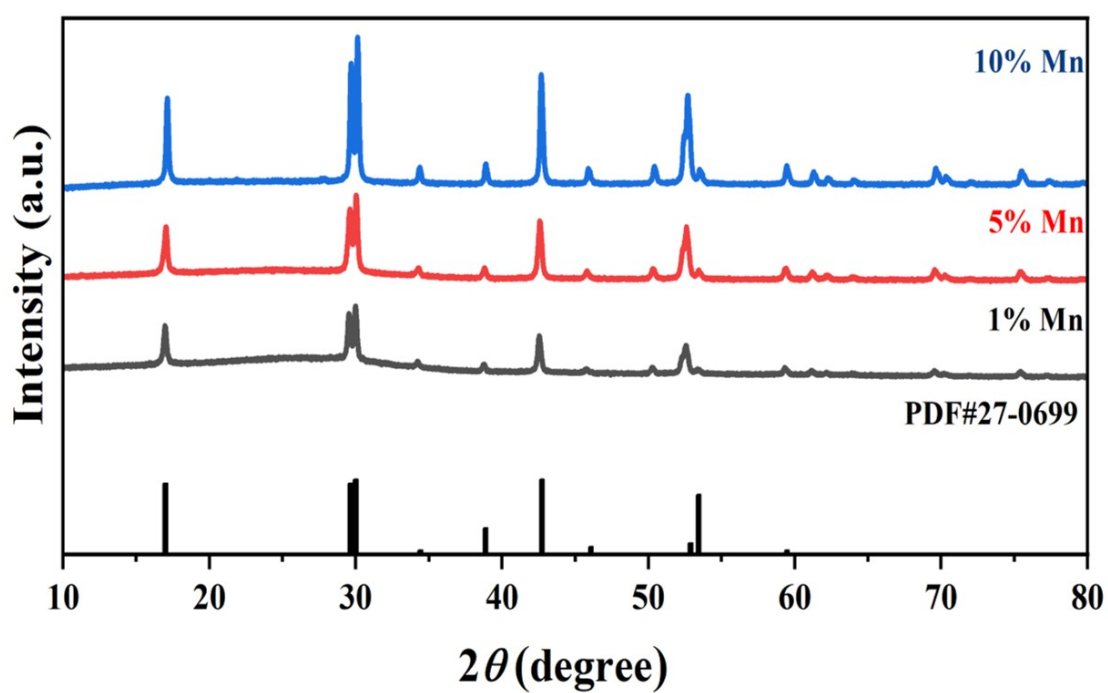

**Fig. S1** The XRD patterns of 1%, 5% and 10% Mn<sup>2+</sup> doping of NaGdF<sub>4</sub>:20%Ce<sup>3+</sup> NPs and the standard card of hexagonal phase NaGdF<sub>4</sub> crystal.

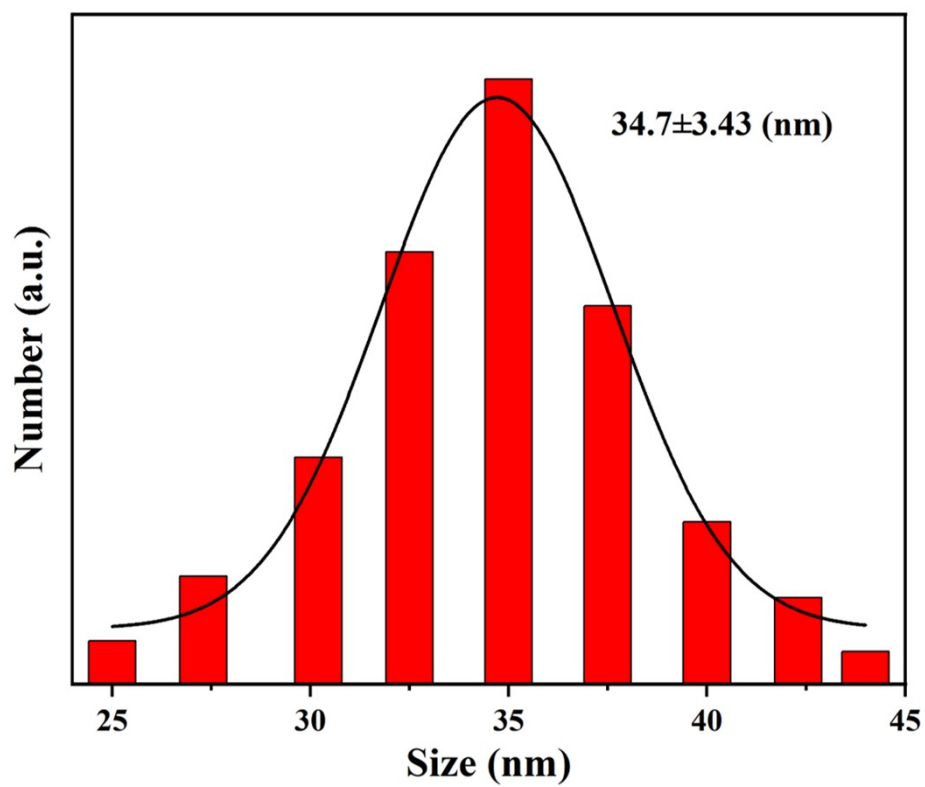

**Fig. S2** The size distribution of the as-prepared 1%  $\text{Mn}^{2+}$  doping  $\beta$ - $\text{NaGdF}_4:20\%\text{Ce}^{3+}$  NPs based on TEM image.

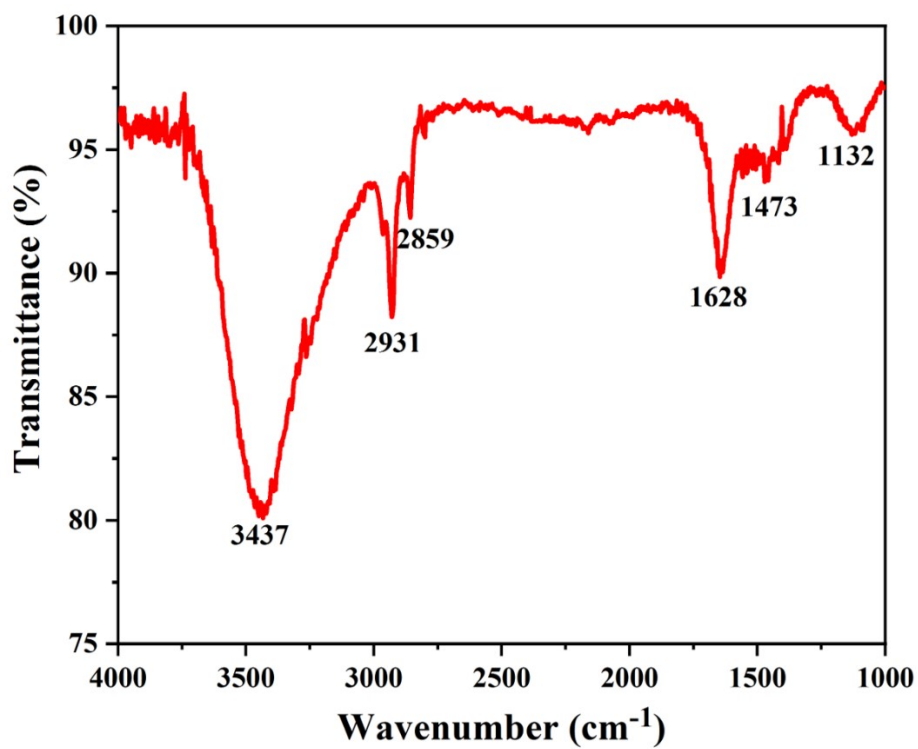

**Fig. S3** FTIR spectrum of the PEG-modified 1% Mn<sup>2+</sup> doping  $\beta$ -NaGdF<sub>4</sub>:20%Ce<sup>3+</sup> NPs
